# Supplementary material for: Carbon materials for effective purification of aqueous solutions from tributyl phosphate
Source: Royal Society of Chemistry journal article supplement (doi:10.1039/d4cp02731k), 2024-01-01
Supplement: d4cp02731k1.pdf [file d4cp02731k1.pdf]

## SUPPLEMENTARY MATERIALS

### Carbon materials for effective purification of aqueous solutions from tributyl phosphate

Tamuna Bakhii,<sup>a</sup> Andrey Toropov,<sup>a</sup> Iurii Nevolin,<sup>a,b</sup> Konstantin Maslakov,<sup>a</sup> Anna Romanchuk,<sup>\*a</sup> Stepan Kalmykov<sup>a</sup>

<sup>a</sup>Department of Chemistry, Lomonosov Moscow State University, Leninskie Gory, Moscow, 119991, Russia

<sup>b</sup>Frumkin Institute of Physical Chemistry and Electrochemistry, Russian Academy of Sciences, 31 Bldg 4, Leninsky Prospekt, Moscow 119071, Russia

\*Correspondence: [romanchukay@my.msu.ru](mailto:romanchukay@my.msu.ru)

Table S1. XPS elemental compositions of studied sorbents, at. %.

| Sample | C    | O   | S   | Al  |
|--------|------|-----|-----|-----|
| A      | 89.0 | 9.5 | –   | 1.5 |
| B      | 95.6 | 4.3 | 0.1 | –   |
| C      | 94.7 | 5.3 | –   | –   |
| D      | 93.0 | 7.0 | –   | –   |

Table S2. Contents of different carbon species in studied samples determined by XPS, at. %.

| Species (Binding energy) / Sample   | A    | A after 3M HNO <sub>3</sub> | B    | B after 3M HNO <sub>3</sub> |
|-------------------------------------|------|-----------------------------|------|-----------------------------|
| C–C (sp <sup>2</sup> )<br>~284.4 eV | 62.3 | 36.4                        | 64.6 | 34.0                        |
| C–C (sp <sup>3</sup> )<br>~284.8    | 21.2 | 20.3                        | 24.8 | 13.6                        |
| C–O (epoxy, C–OH)<br>~286.7         | 5.0  | 5.9                         | 5.4  | 3.6                         |
| O=C–O<br>~288.6                     | 1.8  | 8.3                         | 1.1  | 4.8                         |

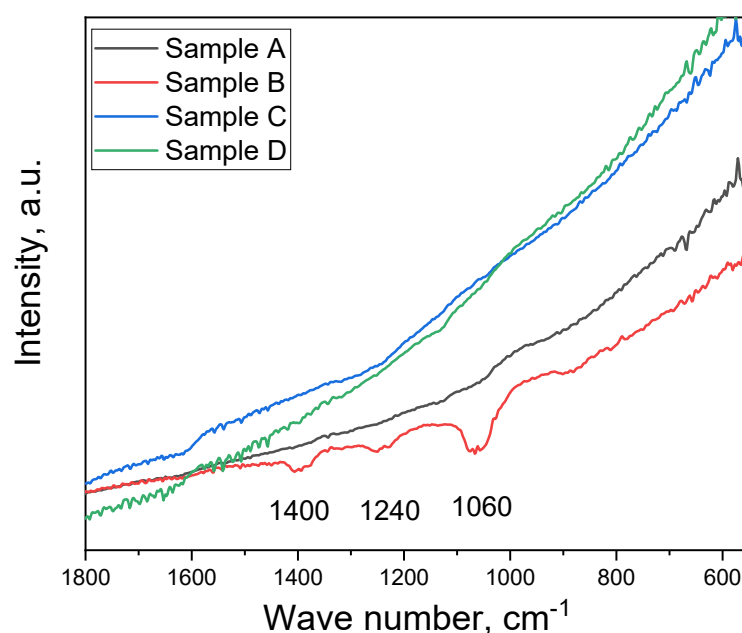

Figure S1. IR spectra of studied samples.

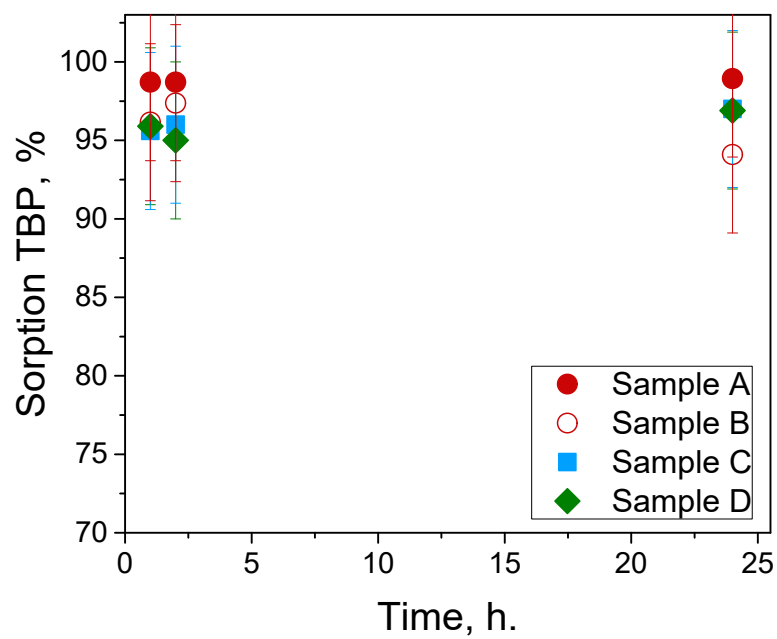

**Figure S2.** Kinetics of TBP sorption in 0.5M HNO<sub>3</sub> ([TBP]/[sorbent] = 0.4 g/g).

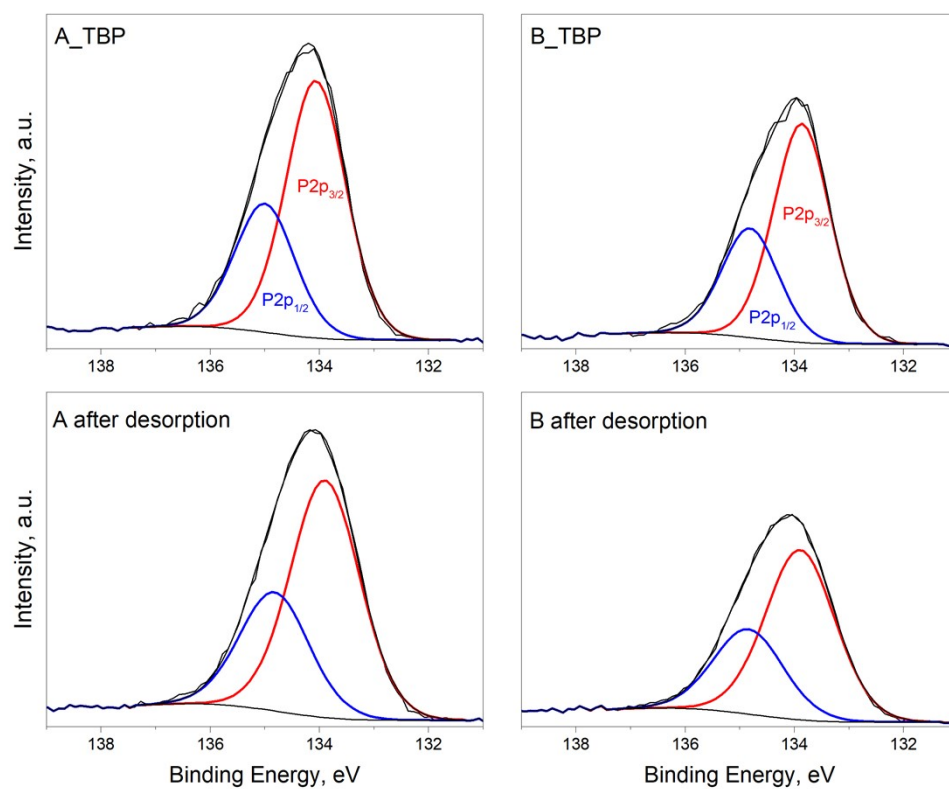

**Figure S3.** P2p XPS spectra of samples A and B before and after thermal desorption of TBP.

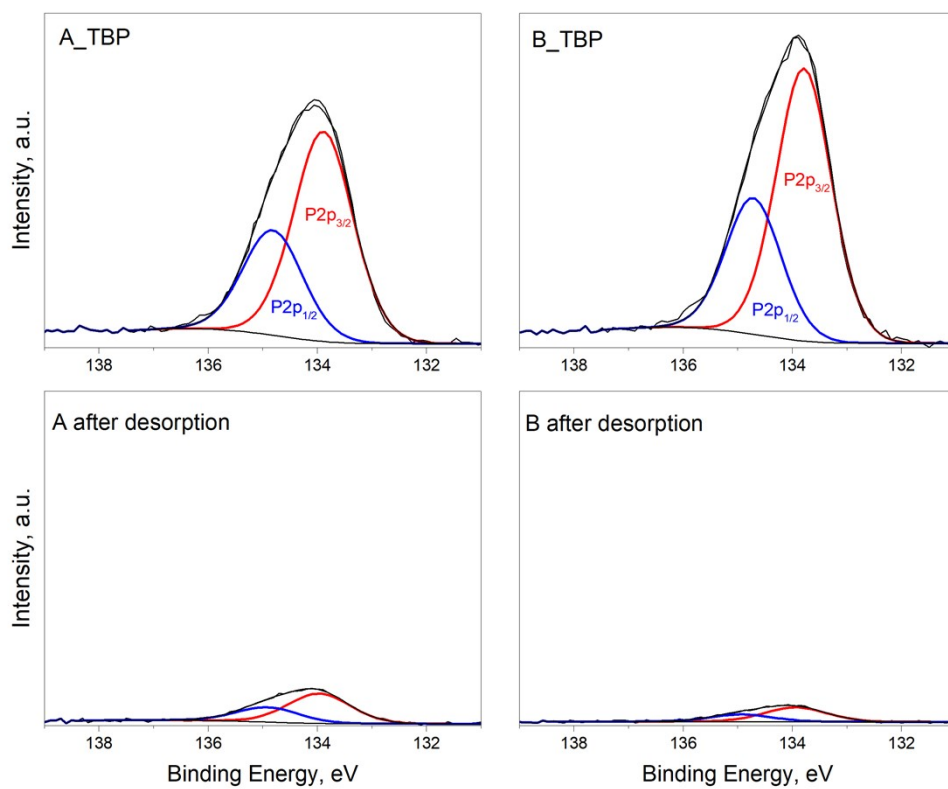

**Figure S4.** P2p XPS spectra of samples A and B before and after kerosene desorption of TBP.
